# Supplementary material for: Gift of time: learning together to embed a palliative approach to care in long-term care
Source: PubMed Central journal article supplement — BMJ Open Qual. 2022 Jul 5;11(3):e001581. doi: 10.1136/bmjoq-2021-001581 (PMC9258516; doi:10.1136/bmjoq-2021-001581), 2022-07-05
Supplement: bmjoq-2021-001581supp001.pdf [file bmjoq-2021-001581supp001.pdf]

| Data Source                    | Description                                                                                                                                                                                                                                                                                                                                                                                                                                                                        | Implementing the EPAC Model (Pillars 1-4) | Improving the Ability of Staff to Have Effective, Timely GOC Discussions (Aim 1) | Improving the Quality of Palliative Care for Residents and Families (Aim 2) | Respecting the Resident's Choice to Die at Home (Aim 3) |
|--------------------------------|------------------------------------------------------------------------------------------------------------------------------------------------------------------------------------------------------------------------------------------------------------------------------------------------------------------------------------------------------------------------------------------------------------------------------------------------------------------------------------|-------------------------------------------|----------------------------------------------------------------------------------|-----------------------------------------------------------------------------|---------------------------------------------------------|
| <b>Implementation Survey</b>   | A pre-implementation survey was circulated to the teams in September 2018. The project leads of each team (and site leads where applicable) were asked to identify the top barriers and facilitators for implementing EPAC and rate the effectiveness of palliative care conversations with residents and families. HEC received 21 responses from the seven teams. A post-implementation survey was circulated in September 2019. HEC received 14 responses from the seven teams. | ✓                                         | ✓                                                                                |                                                                             |                                                         |
| <b>Poster and Presentation</b> | Each of the seven teams completed a poster in March 2019 (mid-implementation) and two presentations in March and September 2019 (mid and post-implementation) based on templates provided by HEC. Teams were asked to describe their objectives, implementation strategies, successes, challenges, and impact stories/quotes from staff and residents/families.                                                                                                                    | ✓                                         |                                                                                  | ✓                                                                           |                                                         |
| <b>Final Report</b>            | Each of the seven teams submitted a final report in October 2019 summarizing their experience with the EPAC collaborative. The report template was developed by HEC and included information on the implementation sites, improvement team members, implementation activities, results including family stories/quotes, changes in organizational culture, spread progress and lessons learned.                                                                                    | ✓                                         | ✓                                                                                | ✓                                                                           | ✓                                                       |
| <b>Final Survey</b>            | In November 2019, a final survey was sent to all team members who participated in at least one of HEC's learning activities (webinars, workshops, and coaching calls). Teams were asked to rate their knowledge and skills in palliative care and quality improvement before and after their participation. HEC received 47 responses from the seven teams.                                                                                                                        |                                           | ✓                                                                                | ✓                                                                           | ✓                                                       |
| <b>Data Submission</b>         | Each of the seven teams submitted monthly data at the site-level to HEC on resident deaths between August 2018-September 2019: date of admission, date of the first GOC conversation, date of the most recent GOC, date of death, location of death, and number of ED transfers and hospital admissions (via ED or direct transfer) in the last three months of life (including reason for transfer).                                                                              |                                           |                                                                                  |                                                                             | ✓                                                       |
